# Supplementary material for: Dietary sugar kelp (Saccharina latissima) consumption did not attenuate atherosclerosis in low-density lipoprotein receptor knockout mice
Source: Royal Society of Chemistry journal article supplement (doi:10.1039/d4fo01037j), 2024-01-01
Supplement: d4fo01037j1.pdf [file d4fo01037j1.pdf]

## Supplemental Figure S1

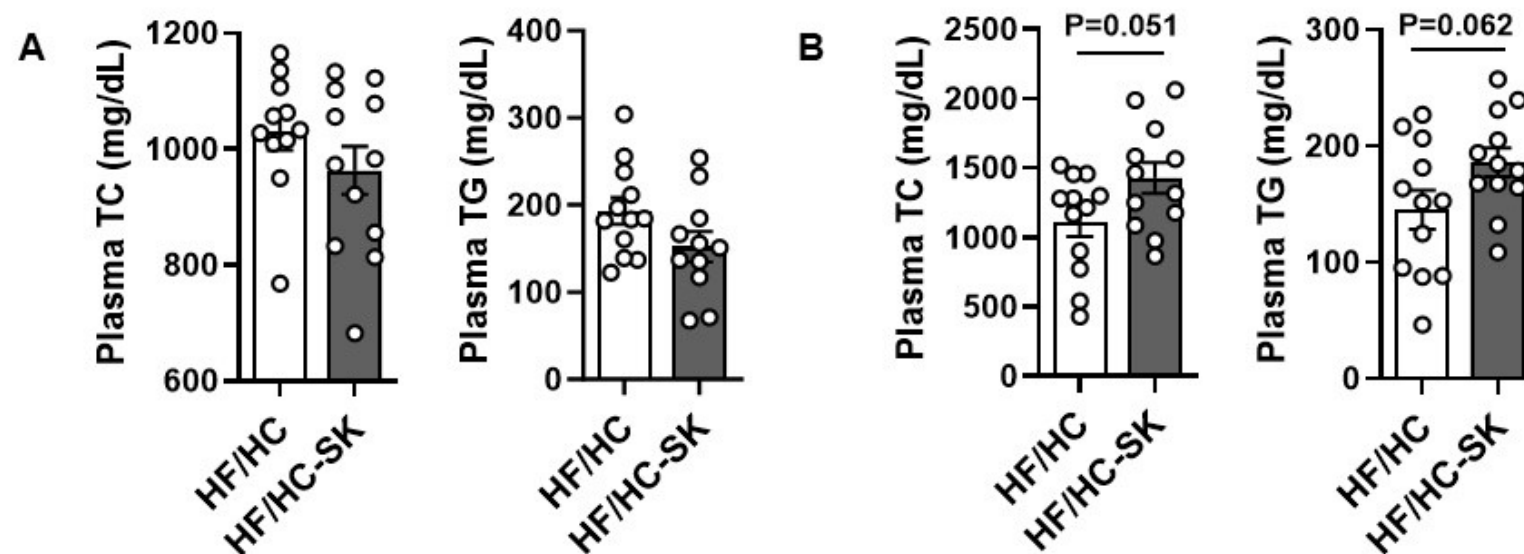

Supplemental Figure S1. Dietary sugar kelp supplementation did not significantly change plasma TG and TC at 6 weeks and 12 weeks of the atherogenic diet in male *Ldlr* KO mice. Mice were fed a HF/HC-Control, or HF/HC-SK for 16 weeks. During the experimental period, plasma samples were collected at 6 weeks and 12 weeks. (A) Plasma TG and TC levels at 6 weeks. (B) Plasma TG and TC levels at 12 weeks. n=10 per group. Data shown are mean $\pm$ SEM. \* indicating a significant difference between HF/HC-Control and HF/HC-SK from the unpaired t-test ( $P<0.05$ ). The P-value between the two groups by unpaired t-test is shown.
